# Supplementary material for: Rogation ceremonies: key to understand past drought variabilityin northeastern Spain since 1650
Source: Copernicus journal article supplement (doi:10.5194/cp-2018-67), 2018-06-18
Supplement: Supplementary file [file cp-2018-67-AC1-supplement.zip]

## Supplementary material

**Table S1. Documentary references for administrative public documentary sources used for rogation monthly indices (All documents are generated and initialed by public notaries). Noted that only the official documents are shown. Each documentary record is given reliability load with the public notary rubric that acts like secretary. This procedure is currently still in force for the same type of document, which is still generated at present time.**

### **Teruel**

- Chapter Acts of the Holy Church and Cathedral of Teruel, 1604-1928, 28 vols.

### **Barbastro**

- Cathedral Archive of Barbastro 'Libro de Gestis', Barbastro (Huesca), 1598-1925, 23 vols.

### **Barcelona**

- City Council Historical Archive of Barcelona (AHMB), "Manual de Novells Ardits" o "Dietari de l'Antic Consell Barceloní", 49 vols., 1390-1839.
- City Council Historical Archive of Barcelona (AHMB), "Acords", 146 vols., 1714-1839.
- City Council Administrative Archive of Barcelona (AACB), "Actes del Ple", 100 vols., 1840-1900.
- Chapter Acts of the Cathedral Historical Archive of Barcelona (ACCB), "Exemplaria", 6 vols., 1536-1814.
- More than 20 private and institutional dietaries.

### **Calahorra**

- Chapter Acts of the Cathedral Historical Archive of Calahorra (La Rioja), 1451-1913, 35 vols.
- Archives of Convento de Santo Domingo 1782–1797. First volume. 158 pages.

### **Cervera**

- Regional Historical Archive of Cervera (AHCC), Comunitat de preveres, "Consells", 12 vols., 1460-1899.
- Regional Historical Archive of Cervera (AHCC), "Llibre Verd del Racional", 1 vol., 1448-1637.
- Regional Historical Archive of Cervera (AHCC), "Llibres de Consells", 212 vols., 1500-1850.

### **Gerona**

- City Council Historical Archive of Girona (AHMG), "Manuals d'Acords", 409 vols., 1421-1850.

### **Huesca**

- Chapter Acts of the Cathedral Historical Archive of Huesca, 1557-1860, 15 vols.

### **La Seu d'Urgell**

- City Council Historical Archive of La Seu d'Urgell (AHMSU), "Llibres de consells i resolucions", 47 vols., 1434-1936.

### **Lleida**

- National Library of Madrid (BNM), Manuscript 18496, "Llibre de Notes Assenyalades de la Ciutat de Lleida", 1 vol.
- Chapter Acts of the Cathedral Historical Archive of Lleida (ACL), "Actes Capitulars", 109 vols., 1445-1923.

### **Tarragona**

- City Council Historical Archive of Tarragona (AHMT), "Llibres d'Acords", 92 vols., 1800-1874.
- Departmental Historical Archive of Tarragona (AHPT), "Liber Consiliorum", 286 vols., 1358-1799.
- Regional Historical Archive of Reus (AHCR), "Actes Municipals", 10 vols., 1493-1618.

- Regional Historical Archive of Reus (AHCR), Comunitat de Preveres de Sant Pere, "Llibre de resolucions", 2 vols., 1450-1617.

#### **Tortosa**

- City Council Historical Archive of Tortosa (AHMTO), "Llibres de provisions i acords municipals", 119 vols., 1348-1855.
- Chapter Acts of the Cathedral Historical Archive of Tortosa (ACCTO), "Actes Capitulars", 217 vols., 1566-1853.

#### **Vic**

- Chapter Acts of the Cathedral Historical Archive of Vic (AEV, ACCV), "Liber porterii", 10 vols., 1392-1585.
- Chapter Acts of the Cathedral Historical Archive of Vic (AEV, ACCV), "Secretariae Liber", 30 vols., 1586-1909.
- City Council Historical Archive of Vic (AHMV), "Indice de los Acuerdos de la Ciudad de Vich des del año 1424", 2 vols., 1424-1833.
- City Council Historical Archive of Vic (AHMV), "Llibre d'Acords", 49 vols., 1424-1837.

#### **Zaragoza**

- Chapter Acts of the Cathedral Historical Archive 'Libro de Actas del Archivo de la Basílica del Pilar', 1516–1668, 17 vols. 2.600 pages.
- City Council Historical Archive of Zaragoza, 1439–1999. 1308 vols. 35.000 pages.
- City Council Historical Archive of Zaragoza. 'Libro de Actas del Archivo Metropolitano de La Seo de Zaragoza', 1475–1945. 81 vols. 12.150 pages.
